# Supplementary material for: High-spin tetranuclear MnII2MnIV2 clusters with unique Mn(ii)–Mn(iv) magnetic exchange: synthesis, structures and magnetism
Source: Royal Society of Chemistry journal article supplement (doi:10.1039/b823042k), 2009-01-01
Supplement: b823042k.pdf [file b823042k.pdf]

## Supplementary information

# High-Spin Tetranuclear Mn<sup>II</sup><sub>2</sub>Mn<sup>IV</sup><sub>2</sub> Clusters with Unique Mn(II)-Mn(IV) Magnetic Exchange. Synthesis, Structures and Magnetism of Mn<sub>4</sub> and Fe<sub>4</sub> Clusters with Tetrakis(2-hydroxyethyl)ethylenediamine †

Ai-Ju Zhou,<sup>a,b</sup> Jun-Liang Liu,<sup>a</sup> Radovan Herchel,<sup>c</sup> Ji-Dong Leng,<sup>a</sup> and Ming-Liang Tong<sup>\*a</sup>

<sup>a</sup> MOE Key Laboratory of Bioinorganic and Synthetic Chemistry / State Key Laboratory of Optoelectronic Materials and Technologies, School of Chemistry and Chemical Engineering, Sun Yat-Sen University, Guangzhou 510275, China. E-mail: [tongml@mail.sysu.edu.cn](mailto:tongml@mail.sysu.edu.cn)

<sup>b</sup> Department of Chemistry, Guangzhou University, Guangzhou 510006, P. R. China

<sup>c</sup> Department of Inorganic Chemistry, Faculty of Science, Palacky University, Krizkovskeho 10, 771 47 Olomouc, Czech Republic

### 1. Bond valence sum calculations

Bond valence sum calculations for complexes **1** and **2** are based on the program BVS\*. *d* is the bond distances around metal center in angstrom unit.

#### Complex 1:

|            |              |                              |
|------------|--------------|------------------------------|
| <b>Mn1</b> | <b>2.089</b> | $d_{\text{average}} = 2.269$ |
| Mn1-O1     | 0.402        | $d = 2.127(2)$               |
| Mn1-O3     | 0.375        | $d = 2.153(2)$               |
| Mn1-O2     | 0.313        | $d = 2.220(2)$               |
| Mn1-O5     | 0.293        | $d = 2.245(2)$               |
| Mn1-O4     | 0.217        | $d = 2.355(3)$               |
| Mn1-N2     | 0.257        | $d = 2.373(3)$               |
| Mn1-N1     | 0.232        | $d = 2.411(3)$               |
| <b>Mn2</b> | <b>4.436</b> | $d_{\text{average}} = 1.907$ |
| Mn2-O10    | 0.902        | $d = 1.828(2)$               |
| Mn2-O9     | 0.846        | $d = 1.852(2)$               |
| Mn2-O11    | 0.803        | $d = 1.871(2)$               |

|            |              |                              |
|------------|--------------|------------------------------|
| Mn2-O6     | 0.661        | $d = 1.943(2)$               |
| Mn2-O3     | 0.661        | $d = 1.943(2)$               |
| Mn2-O2     | 0.562        | $d = 2.003(2)$               |
| <b>Mn3</b> | <b>2.082</b> | $d_{\text{average}} = 2.270$ |
| Mn3-O6     | 0.393        | $d = 2.136(2)$               |
| Mn3-O8     | 0.366        | $d = 2.162(2)$               |
| Mn3-O5     | 0.312        | $d = 2.221(2)$               |
| Mn3-O2     | 0.301        | $d = 2.234(2)$               |
| Mn3-N4     | 0.267        | $d = 2.358(3)$               |
| Mn3-O7     | 0.214        | $d = 2.360(3)$               |
| Mn3-N3     | 0.229        | $d = 2.416(3)$               |
| <b>Mn4</b> | <b>4.449</b> | $d_{\text{average}} = 1.906$ |
| Mn4-O13    | 0.905        | $d = 1.827(2)$               |
| Mn4-O12    | 0.853        | $d = 1.849(2)$               |
| Mn4-O14    | 0.793        | $d = 1.876(2)$               |
| Mn4-O1     | 0.672        | $d = 1.937(2)$               |
| Mn4-O8     | 0.665        | $d = 1.941(2)$               |
| Mn4-O5     | 0.562        | $d = 2.003(2)$               |
| <b>Mn5</b> | <b>2.067</b> | $d_{\text{average}} = 2.271$ |
| Mn5-O17    | 0.394        | $d = 2.135(2)$               |
| Mn5-O15    | 0.370        | $d = 2.159(2)$               |
| Mn5-O18    | 0.291        | $d = 2.247(2)$               |
| Mn5-O20    | 0.279        | $d = 2.262(2)$               |
| Mn5-O16    | 0.226        | $d = 2.341(3)$               |
| Mn5-N5     | 0.267        | $d = 2.358(3)$               |
| Mn5-N6     | 0.241        | $d = 2.397(3)$               |
| <b>Mn6</b> | <b>4.450</b> | $d_{\text{average}} = 1.905$ |
| Mn6-O24    | 0.888        | $d = 1.834(2)$               |
| Mn6-O23    | 0.855        | $d = 1.848(2)$               |
| Mn6-O25    | 0.778        | $d = 1.883(2)$               |
| Mn6-O15    | 0.683        | $d = 1.931(2)$               |
| Mn6-O19    | 0.667        | $d = 1.940(2)$               |
| Mn6-O18    | 0.579        | $d = 1.992(2)$               |
| <b>Mn7</b> | <b>2.069</b> | $d_{\text{average}} = 2.271$ |
| Mn7-O19    | 0.387        | $d = 2.141(2)$               |
| Mn7-O21    | 0.372        | $d = 2.156(2)$               |
| Mn7-O20    | 0.298        | $d = 2.238(2)$               |
| Mn7-O18    | 0.281        | $d = 2.260(2)$               |
| Mn7-O22    | 0.229        | $d = 2.335(3)$               |

|            |              |                              |
|------------|--------------|------------------------------|
| Mn7-N8     | 0.270        | $d = 2.354(3)$               |
| Mn7-N7     | 0.232        | $d = 2.411(3)$               |
| <b>Mn8</b> | <b>4.432</b> | $d_{\text{average}} = 1.907$ |
| Mn8-O27    | 0.885        | $d = 1.835(2)$               |
| Mn8-O26    | 0.862        | $d = 1.845(2)$               |
| Mn8-O28    | 0.778        | $d = 1.883(2)$               |
| Mn8-O21    | 0.669        | $d = 1.939(2)$               |
| Mn8-O17    | 0.665        | $d = 1.941(2)$               |
| Mn8-O20    | 0.573        | $d = 1.996(2)$               |

**Complex 2:**

---

|            |              |                              |
|------------|--------------|------------------------------|
| <b>Mn1</b> | <b>2.075</b> | $d_{\text{average}} = 2.271$ |
| Mn1-O2     | 0.406        | $d = 2.1231(18)$             |
| Mn1-O3     | 0.367        | $d = 2.1613(18)$             |
| Mn1-O1     | 0.314        | $d = 2.2191(18)$             |
| Mn1-O1     | 0.262        | $d = 2.2854(19)$             |
| Mn1-O4     | 0.233        | $d = 2.329(2)$               |
| Mn1-N2     | 0.263        | $d = 2.364(2)$               |
| Mn1-N1     | 0.230        | $d = 2.413(2)$               |
| <b>Mn2</b> | <b>4.480</b> | $d_{\text{average}} = 1.902$ |
| Mn2-O7     | 0.871        | $d = 1.841(2)$               |
| Mn2-O6     | 0.856        | $d = 1.8476(19)$             |
| Mn2-O5     | 0.799        | $d = 1.873(2)$               |
| Mn2-O2     | 0.694        | $d = 1.925(2)$               |
| Mn2-O3     | 0.667        | $d = 1.940(2)$               |
| Mn2-O1     | 0.593        | $d = 1.9836(18)$             |

\* Bond-Valence Parameters for Solids, N. E. Brese and M. O'keeffe, *Acta Cryst.*, 1991, **B47**, 192-197.
